# Supplementary material for: AgBr/g-C3N4nanocomposites for enhanced visible-light-driven photocatalytic inactivation ofEscherichia coli
Source: Royal Society of Chemistry journal article supplement (doi:10.1039/c8ra06923a), 2018-01-01
Supplement: c8ra06923a1.pdf [file c8ra06923a1.pdf]

## Supplementary Information

### **AgBr/g-C<sub>3</sub>N<sub>4</sub> Nanocomposites for Enhanced Visible-light-driven**

### **Photocatalytic Inactivation of Escherichia coli**

Sihui Zhan<sup>a</sup>, Qianlei hou<sup>a</sup>, Yi Li<sup>b</sup>, Shuanglong Ma<sup>a</sup>, Pengfei Wang<sup>a</sup>, Yanan Li<sup>b</sup>, Haitao Wang<sup>\*a</sup>

<sup>a</sup>Key Laboratory of Pollution Processes and Environmental Criteria (Ministry of Education), College of Environmental Science and Engineering, Nankai University, Tianjin 300071, P. R. China;

<sup>b</sup>Department of Chemistry, Tianjin University, Tianjin 300072, P. R. China;

\*Corresponding authors. E-mail:envwang@gmail.com; envwang@nankai.edu.cn

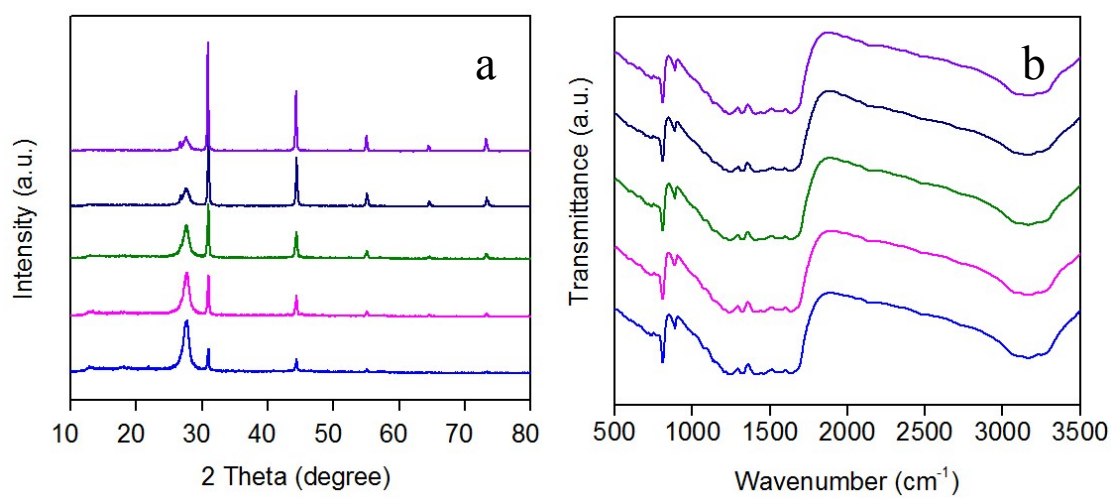

**Figure S1.** (a) XRD patterns and (b) FTIR spectra of AgBr/g-C<sub>3</sub>N<sub>4</sub> photocatalysts. The percentage of AgBr from bottom to the up is 5, 10, 20, 30, and 40 %.

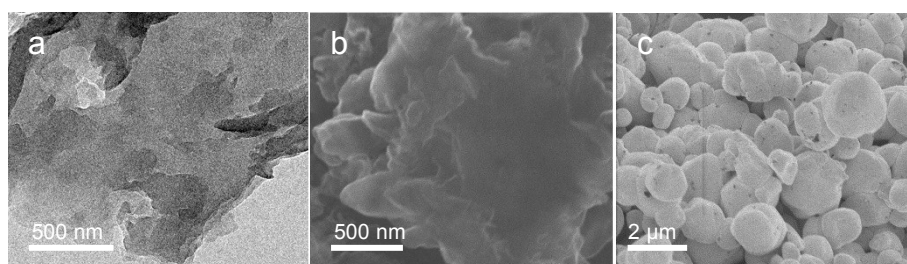

**Figure S2.** (a) TEM and (b) SEM image of pristine g-C<sub>3</sub>N<sub>4</sub>; (c) SEM image of AgBr nanoparticles prepared without the presence of g-C<sub>3</sub>N<sub>4</sub>

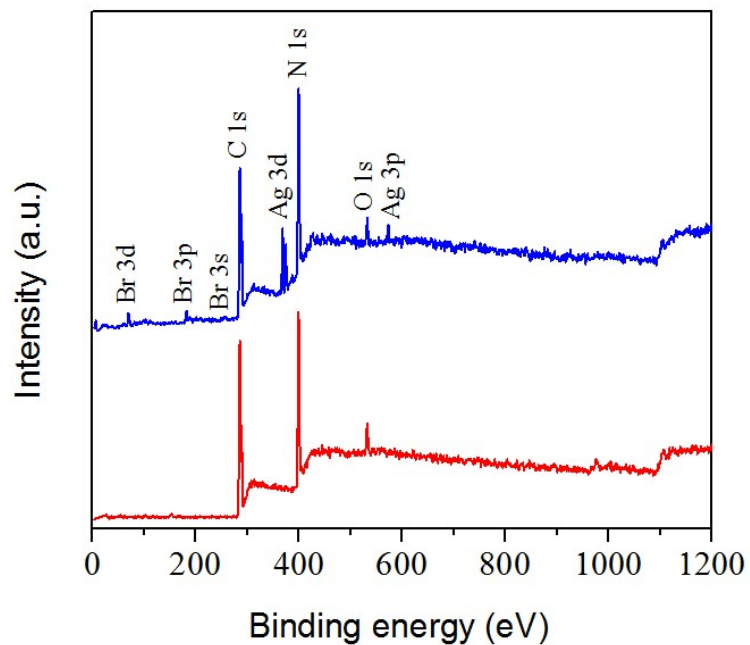

**Figure S3.** XPS survey spectra of the g-C<sub>3</sub>N<sub>4</sub> (red) and AgBr/g-C<sub>3</sub>N<sub>4</sub> (blue) photocatalysts.

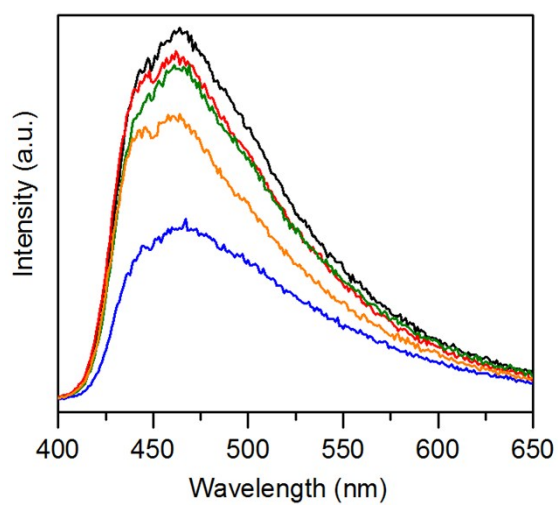

**Figure S4.** PL spectra of AgBr/g-C<sub>3</sub>N<sub>4</sub> photocatalysts. The percentage of AgBr from bottom to the up is 30, 40, 20, 10, and 5 %.
